# Supplementary material
Source: ML conference proceedings conference paper supplement (https://openaccess.thecvf.com/content/CVPR2024/html/Perera_Discriminative_Sample-Guided_and_CVPR_2024_paper.html)
Supplement: Supplementary file [file Perera_Discriminative_Sample-Guided_and_CVPR_2024_supplemental.pdf]

# Discriminative Sample-Guided and Parameter-Efficient Feature Space Adaptation for Cross-Domain Few-Shot Learning

## Supplementary Material

### 9. Datasets

**Meta-Dataset** [55] is a few-shot classification benchmark that initially consists of ten datasets: ILSVRC\_2012 (ImageNet) [51], Omniglot [34], FGVC-Aircraft (Aircraft) [44], CUB-200-2011 (Birds) [58], Describable Textures (Textures) [13], QuickDraw [31], FGVCx Fungi (Fungi) [8], VGG Flower [46], Traffic Signs [26] and MS-COCO [42]. It further expands with the addition of MNIST [35], CIFAR-10 [33] and CIFAR-100 [33]. Each dataset is further divided into train, validation and test sets with disjoint classes. We follow the standard training protocols proposed by [55] and consider both “Training on all datasets” (MDL: multi-domain learning) and “Training on ImageNet-Train only” (SDL: single-domain learning) settings. For the former, we follow the standard procedure and use the training set of the first eight datasets for pre-training. During evaluation, the test set of the eight datasets are used for evaluating the generalization ability in the seen domains while the remaining five datasets are used to evaluate the cross-domain generalization ability. In the “Training on ImageNet-Train only” setting, we follow the standard procedure and only use the train set of ImageNet for pre-training. The evaluation is performed on the test set of ImageNet as the seen domain while the rest 12 datasets are considered unseen domains. Additionally, to compare our method with more recent state-of-the-art [28], we also use a pre-trained model on the full ImageNet dataset for “Training on ImageNet-Full” (SDL-E: single-domain learning-extra data) setting, where the evaluation is performed similarly to the “Training on ImageNet-Train only” setting.

We also report additional results for the following datasets in the Appendix.

**miniImageNet** [57] contains 100 classes from ImageNet-1k, set into 64 training, 16 validation and 20 testing classes.

**CIFAR-FS** [5] is created by dividing the original CIFAR-100 into 64 training, 16 validation and 20 testing classes.

### 10. Implementation details

#### 10.1. Pre-training using Masked Image Modelling

We employ Masked Image Modelling (MIM) to pre-train the feature extractor and follow the hyper-parameters and data augmentations recommended in [62]. The teacher patch temperature was set to 0.04, in contrast to the default value of 0.07 after observing that a lower temperature leads

to more consistent and stable training losses.<sup>2</sup>

**MDL:** We employ the train sets of the eight in-domain datasets (ImageNet, Omniglot, Aircraft, Birds, Textures, and VGG Flower) considered under the MDL setting for pre-training  $f_\theta$ .

**SDL:** We employ the train set of the ImageNet dataset for pre-training  $f_\theta$ .

**SDL-E:** The entire ImageNet dataset is utilized to train the feature extractor<sup>3</sup>  $f_\theta$  [28].

#### 10.2. Pre-training on DINO

**SDL-E:** To compare with the MIM pre-training on SDL-E, we utilize the pre-trained checkpoint weights provided by DINO [9] after training on the entire ImageNet dataset.

#### 10.3. Hyperparameters

##### 10.3.1 Task-specific parameter initialization

For results reported in the main text, we choose constant initialization of task-specific parameters  $\gamma$  (scale) and  $\beta$  (shift) as one and zero, respectively. However, one could also employ a normalized initialization, where the mean values of  $\gamma$  and  $\beta$  are one and zero [62]. Therefore, we report results for normalized initialization and constant initialization in Supplementary Table 6 columns 1 and 2, respectively. Notably, we obtain better results for the constant initialization in comparison to the normalized initialization.

##### 10.3.2 AdamW vs NAdam

Recently, AdamW has gained popularity as a preferred choice for fine-tuning large models such as ViTs [59]. Nevertheless, our results, as detailed in Supplementary Table 6, columns 2 and 3, demonstrate that NAdam yields superior performance in the context of cross-domain few-shot classification.

##### 10.3.3 Anchor initialization

While  $A_\phi$  anchors in DIPA are randomly initialized for each task, one can argue that using the mean of the support embedding vectors can be a favourable anchor initialization point. Consequently, we report the results for random vs custom initialization of anchors in Supplementary Table 6, columns 2 and 4. Here, the anchors are randomly initialized for  $A_\phi$  (random) while the mean of class embedding vectors

<sup>2</sup><https://github.com/bytedance/ibot/issues/19>

<sup>3</sup><https://github.com/bytedance/ibot#pre-trained-models>

|                            |              |                     |                     |                     |   |
|----------------------------|--------------|---------------------|---------------------|---------------------|---|
| $\gamma, \beta$ (constant) |              | ✓                   | ✓                   | ✓                   | ✓ |
| $\gamma, \beta$ (normal)   | ✓            |                     |                     |                     | ✓ |
| NAdam                      | ✓            | ✓                   |                     |                     | ✓ |
| AdamW                      |              |                     | ✓                   |                     |   |
| $A_\phi$ (random)          | ✓            | ✓                   | ✓                   |                     |   |
| $A_\phi$ (custom)          |              |                     |                     |                     | ✓ |
| ImageNet                   | 69.22 ± 0.94 | <b>70.86 ± 0.95</b> | 68.21 ± 0.96        | 70.25 ± 0.98        |   |
| Omniglot                   | 83.55 ± 1.17 | <b>84.68 ± 1.10</b> | 82.79 ± 1.18        | 84.55 ± 1.15        |   |
| Aircraft                   | 85.91 ± 1.06 | 86.33 ± 0.95        | <b>86.55 ± 1.00</b> | 85.05 ± 1.06        |   |
| Birds                      | 90.31 ± 0.80 | <b>90.75 ± 0.75</b> | 88.49 ± 0.88        | 89.70 ± 0.88        |   |
| Textures                   | 87.66 ± 0.66 | 88.60 ± 0.51        | 87.15 ± 0.62        | <b>88.61 ± 0.56</b> |   |
| Quick Draw                 | 74.27 ± 0.82 | <b>75.29 ± 0.77</b> | 72.81 ± 0.83        | 75.10 ± 0.77        |   |
| Fungi                      | 66.07 ± 1.05 | <b>66.64 ± 1.05</b> | 64.30 ± 1.05        | 65.54 ± 1.07        |   |
| VGG Flower                 | 97.71 ± 0.32 | <b>97.88 ± 0.30</b> | 97.24 ± 0.38        | 97.63 ± 0.32        |   |
| Traffic Sign               | 89.84 ± 1.19 | <b>91.29 ± 0.96</b> | 87.29 ± 1.13        | 89.80 ± 0.97        |   |
| MS-COCO                    | 62.34 ± 1.04 | <b>64.78 ± 0.95</b> | 57.84 ± 1.07        | 64.67 ± 1.01        |   |
| MNIST                      | 96.64 ± 0.49 | <b>96.87 ± 0.53</b> | 96.14 ± 0.60        | 96.82 ± 0.50        |   |
| CIFAR-10                   | 84.56 ± 0.85 | 87.40 ± 0.64        | 79.72 ± 1.03        | <b>87.81 ± 0.66</b> |   |
| CIFAR-100                  | 79.38 ± 0.94 | <b>81.24 ± 0.78</b> | 75.29 ± 0.94        | 80.28 ± 0.83        |   |
| Average Seen               | 79.6         | <b>82.6</b>         | 80.9                | 82.1                |   |
| Average Unseen             | 82.6         | <b>84.3</b>         | 79.3                | 82.7                |   |
| Average All                | 80.8         | <b>83.3</b>         | 80.3                | 82.3                |   |

Table 6. Comparison of varying the task-specific parameter initialization (constant vs normal), Optimizers (NAdam vs AdamW) and  $A_\phi$  anchor initialization (random vs custom) in the MDL setting.

initializes the anchors for  $A_\phi$  (custom). Notably, using unadapted feature embeddings for anchor initialization may hinder fine-tuning due to priors imposed by unadapted features. In contrast, using random initialization, together with a substantial learning rate may offer better adaptability for anchors during fine-tuning without being influenced by irrelevant priors. This is also reflected in the results reported in Supplementary Table 6, columns 2 and 4, where random initialization outperforms custom initialization, confirming our selection in the DIPA framework.

### 10.3.4 Number of fine-tuning iterations

We experimentally determined the number of fine-tuning iterations. We report the results for four such scenarios in Supplementary Table 7. As reported in the results,  $l_{A_\phi}$  with 80 iterations provides the highest accuracy. Therefore, in our framework, we use 80 as the number of iterations for fine-tuning.

| Fine Tune   | # Iterations | Avg. Seen   | Avg. Unseen | Avg. All    |
|-------------|--------------|-------------|-------------|-------------|
| DIPA        | 40           | 81.5        | 82.4        | 81.8        |
| <b>DIPA</b> | <b>80</b>    | <b>82.6</b> | <b>84.3</b> | <b>83.3</b> |

Table 7. Comparing the average (Avg.) performance variation as the number of epochs varies for seen, unseen and all domains in the MDL setting.

## 11. Additional Results for Meta-Dataset

### 11.1. Feature Space Visualizations: Before and After Fine-Tuning

By using UMAP visualizations, we identify the impact of fine-tuning the feature space using  $l_{A_\phi}$  in Supplementary Fig. 6 and 7. Here, the left columns illustrate that semantic clusters have already emerged using the pre-trained MIM features, although overlapped/dispersed in some instances. Thereafter, as illustrated in the right columns,  $l_{A_\phi}$  uses the strong initialization provided by MIM and further refines the feature space to form better-separated clusters that show high inter-class variance and low intra-class variance.

### 11.2. Prototype Visualizations

The placement of anchors  $A_\phi$  and mean embedding-based prototypes after fine-tuning is visualized in Fig. 8. As discussed in Section 6.1, while  $A_\phi$  provides strong supervision for cluster formation during fine-tuning, after fine-tuning, we observe that they are placed with a small offset from the mean representation (mean embedding prototype) of the clusters.

### 11.3. Impact of tuned depth

Supplementary Table 8 reports the variation of accuracies as the number of tuned layers  $d_t$  vary on the MDL setting for Meta-Dataset. A summary of Supplementary Table 8 is shown in the main text’s Fig. 4 and 5.

### 11.4. Feature fusion depth

We report the dataset-level accuracy values obtained as we vary the feature fusion depths in Supplementary Table 9, where a summary of it was presented in the main text.

### 11.5. Pre-training results

The dataset-level accuracies reported in the SDL-E setting by DINO and MIM pre-trained models with varying fine-tuning strategies are reported in Supplementary Table 10.

### 11.6. Further results on Meta-Dataset

After evaluating our framework over a broad range of varying shots  $K$  (e.g. up to 100 shots), we further analyze our framework in a more challenging setting. While  $l_{A_\phi}$  requires at least two examples per class in order to gain benefits from its discriminative sample-based feature space adaptation, here we evaluate its performance in the more challenging varying-way, 5-shot setting, comparing it with other works that have reported results in this context [37]. As shown in Supplementary Table 11, overall performance for all methods has decreased due to the even more challenging nature of the support set. Nevertheless, our method still outperforms the existing methods when the number of

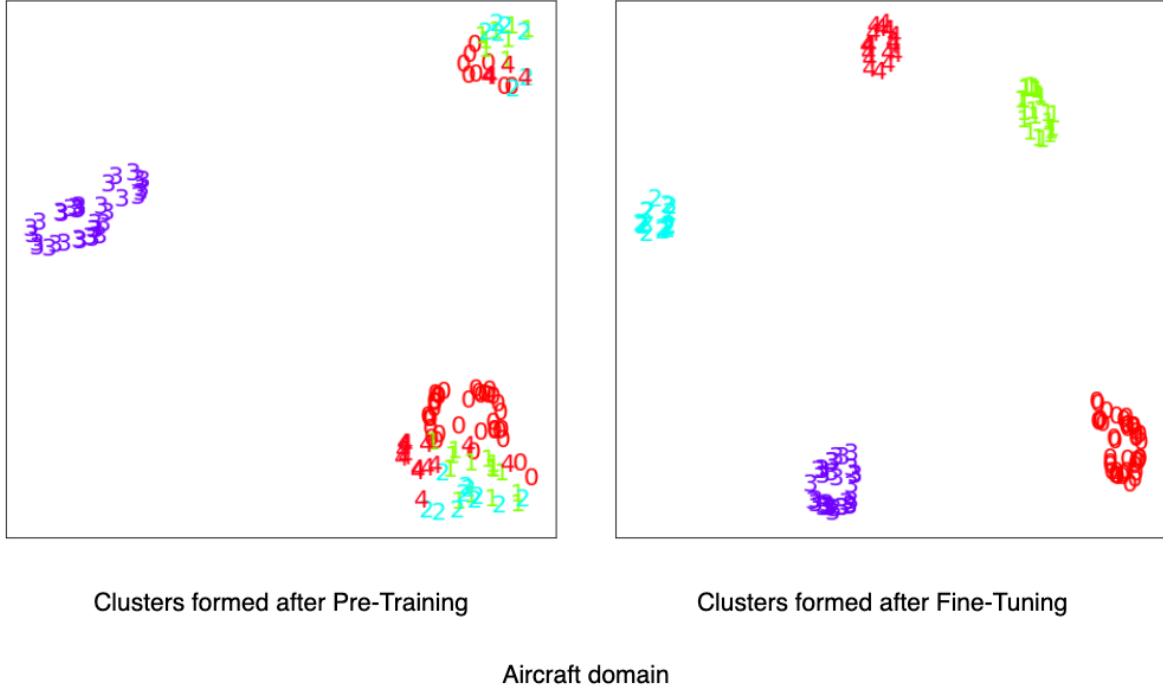

Figure 6. UMAP visualization of clusters formed in the feature space for Aircraft domain in MDL setting. The clusters formed before and after fine-tuning with DIPA, are illustrated in the first and second columns, respectively.

| $d$            | 0            | 1            | 2            | 3            | 4            | 5            | 6            | 7            | 8            | 9            | 10           | 11           | 12           |
|----------------|--------------|--------------|--------------|--------------|--------------|--------------|--------------|--------------|--------------|--------------|--------------|--------------|--------------|
| ImageNet       | 66.51 ± 1.02 | 68.22 ± 0.95 | 70.24 ± 1.01 | 71.11 ± 0.95 | 71.37 ± 0.94 | 71.00 ± 0.92 | 71.36 ± 0.91 | 70.86 ± 0.95 | 69.71 ± 0.94 | 68.39 ± 0.95 | 68.05 ± 0.92 | 67.57 ± 0.95 | 67.13 ± 0.93 |
| OmniGlot       | 67.04 ± 1.23 | 72.63 ± 1.29 | 71.87 ± 1.34 | 75.52 ± 1.25 | 80.10 ± 1.16 | 81.92 ± 1.19 | 83.58 ± 1.09 | 84.68 ± 1.10 | 82.91 ± 1.25 | 84.25 ± 1.19 | 84.51 ± 1.16 | 84.81 ± 1.11 | 84.33 ± 1.16 |
| Aircraft       | 52.97 ± 0.95 | 75.97 ± 0.96 | 77.01 ± 1.04 | 80.67 ± 0.99 | 83.88 ± 0.99 | 85.12 ± 0.99 | 85.95 ± 1.02 | 86.33 ± 0.95 | 85.45 ± 1.09 | 86.35 ± 0.95 | 85.04 ± 1.03 | 85.35 ± 0.99 | 83.44 ± 1.12 |
| Birds          | 83.12 ± 0.82 | 89.04 ± 0.69 | 90.40 ± 0.59 | 90.20 ± 0.67 | 90.92 ± 0.71 | 91.01 ± 0.74 | 91.22 ± 0.67 | 90.75 ± 0.75 | 90.50 ± 0.68 | 89.74 ± 0.77 | 89.17 ± 0.80 | 89.56 ± 0.74 | 88.63 ± 0.75 |
| Textures       | 84.95 ± 0.50 | 86.89 ± 0.58 | 88.34 ± 0.53 | 88.49 ± 0.52 | 88.25 ± 0.59 | 88.95 ± 0.56 | 88.52 ± 0.58 | 88.60 ± 0.51 | 87.83 ± 0.65 | 87.39 ± 0.64 | 86.20 ± 0.66 | 84.95 ± 0.71 | 85.47 ± 0.57 |
| Quickdraw      | 54.78 ± 0.94 | 63.47 ± 0.93 | 64.63 ± 0.96 | 67.80 ± 0.90 | 71.55 ± 0.94 | 73.69 ± 0.85 | 74.65 ± 0.85 | 75.29 ± 0.77 | 74.38 ± 0.75 | 75.55 ± 0.80 | 75.97 ± 0.73 | 75.49 ± 0.75 | 75.05 ± 0.83 |
| Fungi          | 57.33 ± 1.06 | 61.30 ± 1.06 | 62.99 ± 1.18 | 63.86 ± 1.07 | 66.35 ± 1.08 | 66.87 ± 1.12 | 66.91 ± 1.06 | 66.64 ± 1.05 | 67.52 ± 1.05 | 65.03 ± 1.06 | 63.45 ± 1.10 | 63.59 ± 1.06 | 63.96 ± 1.08 |
| VGG_Flower     | 97.56 ± 0.25 | 97.10 ± 0.34 | 97.29 ± 0.33 | 97.27 ± 0.36 | 97.78 ± 0.30 | 98.06 ± 0.28 | 97.99 ± 0.29 | 97.88 ± 0.30 | 97.65 ± 0.31 | 97.55 ± 0.32 | 97.14 ± 0.36 | 97.00 ± 0.38 | 97.28 ± 0.32 |
| Traffic Sign   | 40.20 ± 1.07 | 52.42 ± 1.25 | 57.42 ± 1.27 | 60.77 ± 1.19 | 68.90 ± 1.23 | 75.15 ± 1.17 | 80.71 ± 1.17 | 85.52 ± 1.04 | 89.46 ± 0.91 | 91.29 ± 0.96 | 91.99 ± 0.96 | 92.76 ± 0.83 | 92.25 ± 0.96 |
| MSCOCO         | 54.13 ± 0.97 | 56.50 ± 0.95 | 58.64 ± 0.97 | 63.19 ± 1.01 | 63.22 ± 0.95 | 65.75 ± 1.00 | 65.59 ± 0.97 | 65.32 ± 0.93 | 64.70 ± 0.97 | 64.78 ± 0.95 | 63.46 ± 0.92 | 62.56 ± 1.00 | 62.02 ± 0.94 |
| MNIST          | 74.81 ± 0.74 | 86.77 ± 0.75 | 88.46 ± 0.73 | 89.86 ± 0.80 | 93.75 ± 0.68 | 94.51 ± 0.68 | 95.27 ± 0.65 | 96.13 ± 0.59 | 96.68 ± 0.53 | 96.87 ± 0.53 | 96.78 ± 0.50 | 97.51 ± 0.40 | 97.12 ± 0.45 |
| CIFAR-10       | 81.54 ± 0.64 | 86.54 ± 0.60 | 87.14 ± 0.65 | 87.60 ± 0.59 | 88.39 ± 0.58 | 89.17 ± 0.60 | 88.92 ± 0.61 | 89.04 ± 0.56 | 88.09 ± 0.61 | 87.40 ± 0.64 | 86.43 ± 0.68 | 85.75 ± 0.71 | 84.70 ± 0.76 |
| CIFAR-100      | 73.41 ± 0.88 | 78.02 ± 0.79 | 78.57 ± 0.75 | 79.08 ± 0.78 | 81.32 ± 0.76 | 80.71 ± 0.76 | 80.99 ± 0.78 | 81.33 ± 0.81 | 81.45 ± 0.71 | 81.24 ± 0.78 | 80.02 ± 0.77 | 78.78 ± 0.79 | 78.53 ± 0.81 |
| Average Seen   | 70.5         | 76.8         | 77.8         | 79.4         | 81.3         | 82.1         | 82.5         | <b>82.6</b>  | 82           | 81.8         | 81.2         | 81           | 80.7         |
| Average Unseen | 64.8         | 72           | 74           | 76.1         | 79.1         | 81.1         | 82.3         | 83.5         | 84.1         | <b>84.3</b>  | 83.7         | 83.5         | 82.9         |
| Average All    | 68.3         | 75           | 76.4         | 78.1         | 80.4         | 81.7         | 82.4         | <b>83</b>    | 82.8         | 82.8         | 82.2         | 82           | 81.5         |

Table 8. Variation of accuracies as the number of tuned layers  $d_t$  varies in the MDL setting for in-domain and out-of-domain datasets in Meta-Dataset.

| Fusion depth | ImageNet          | OmniGlot          | Aircraft          | Birds             | Textures          | Quick Draw        | Fungi             | VGG Flower        | Traffic Sign      | MS-COCO           | MNIST             | CIFAR-10          | CIFAR-100         | Average All |
|--------------|-------------------|-------------------|-------------------|-------------------|-------------------|-------------------|-------------------|-------------------|-------------------|-------------------|-------------------|-------------------|-------------------|-------------|
| 1            | 70.2 ± 0.9        | 84.9 ± 1.1        | 86.2 ± 1.1        | 90.5 ± 0.7        | 88.3 ± 0.6        | 74.7 ± 0.8        | 66.5 ± 1.0        | 97.3 ± 0.4        | 90.3 ± 1.0        | 63.1 ± 0.9        | <b>97.4 ± 0.4</b> | 87.6 ± 0.6        | 80.4 ± 0.8        | 82.9        |
| 2            | 70.5 ± 1.0        | 84.4 ± 1.2        | 86.7 ± 1.0        | 90.8 ± 0.7        | 87.9 ± 0.6        | 74.8 ± 0.8        | 66.6 ± 1.1        | 97.5 ± 0.3        | 90.4 ± 1.0        | 63.3 ± 1.0        | 97.0 ± 0.5        | <b>88.0 ± 0.6</b> | 80.0 ± 0.8        | 82.9        |
| 4            | 70.9 ± 1.0        | 84.7 ± 1.1        | <b>86.3 ± 1.0</b> | 90.8 ± 0.8        | <b>88.6 ± 0.5</b> | <b>75.3 ± 0.8</b> | <b>66.6 ± 1.0</b> | <b>97.9 ± 0.3</b> | <b>91.3 ± 1.0</b> | <b>64.8 ± 1.0</b> | 96.9 ± 0.5        | 87.4 ± 0.6        | <b>81.2 ± 0.8</b> | <b>83.3</b> |
| 6            | <b>71.6 ± 0.9</b> | <b>85.5 ± 1.1</b> | 86.1 ± 1.0        | <b>90.9 ± 0.7</b> | 88.0 ± 0.5        | <b>75.3 ± 0.8</b> | 66.0 ± 1.0        | 97.6 ± 0.4        | 90.3 ± 1.1        | 63.7 ± 1.0        | 97.3 ± 0.4        | 87.3 ± 0.6        | 80.8 ± 0.8        | 83.1        |
| 8            | 69.2 ± 1.0        | 85.4 ± 1.1        | 85.6 ± 1.0        | 90.4 ± 0.8        | 87.4 ± 0.6        | 75.0 ± 0.8        | 65.4 ± 1.2        | 97.6 ± 0.4        | 90.7 ± 1.0        | 63.5 ± 1.0        | 96.9 ± 0.6        | 86.3 ± 0.7        | 80.0 ± 0.8        | 82.6        |
| 12           | 68.0 ± 1.0        | 85.4 ± 1.1        | 85.7 ± 0.9        | 89.4 ± 0.9        | 87.7 ± 0.6        | 74.5 ± 0.8        | 63.6 ± 1.2        | 97.7 ± 0.3        | <b>91.3 ± 0.9</b> | 62.7 ± 1.0        | 97.2 ± 0.4        | 86.1 ± 0.6        | 78.6 ± 0.8        | 82.1        |

Table 9. Variation of accuracies as the feature fusion depth  $d_f$  vary on the MDL setting.

support images per class is fewer, especially on the challenging unseen domains by 2.9%.

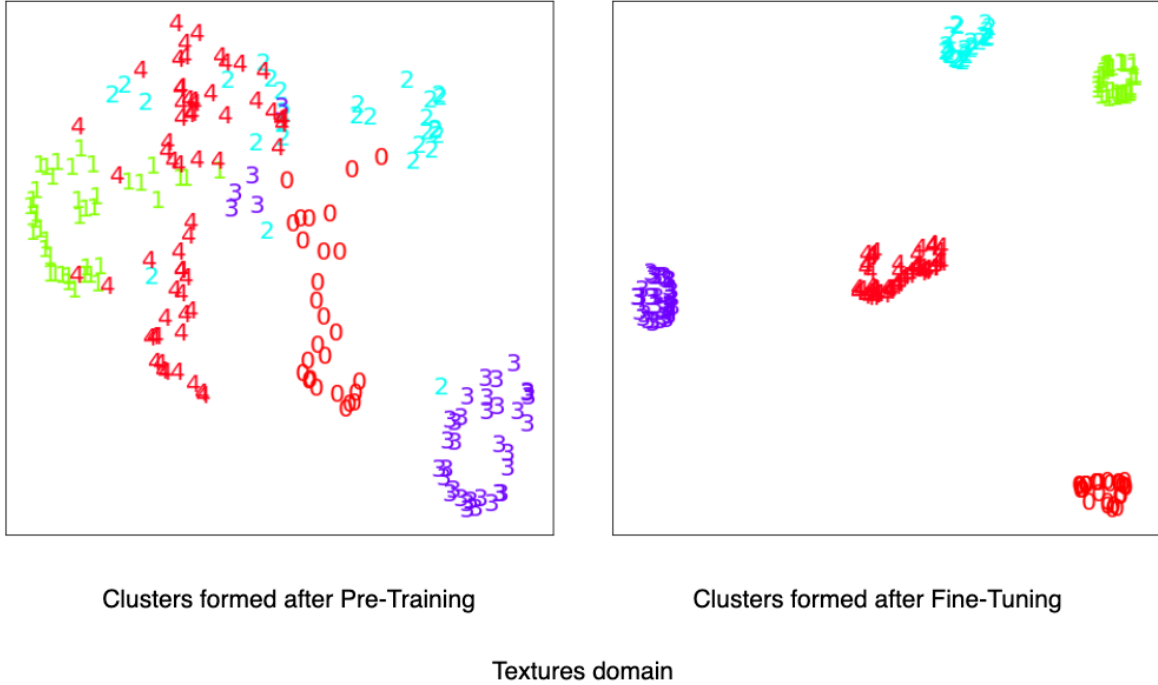

Figure 7. UMAP visualization of clusters formed in the feature space for Textures domain in MDL setting. The clusters formed before and after fine-tuning with DIPA are illustrated in the first and second columns, respectively.

| Pre-training   | MIM          |              | DINO         |              |
|----------------|--------------|--------------|--------------|--------------|
|                | NCC          | DIPA         | NCC          | DIPA         |
| ImageNet       | 75.71 ± 0.81 | 77.26 ± 0.74 | 75.47 ± 0.82 | 75.89 ± 0.78 |
| Omniglot       | 80.38 ± 1.36 | 84.06 ± 1.20 | 80.19 ± 1.31 | 83.65 ± 1.15 |
| Aircraft       | 83.06 ± 1.03 | 87.09 ± 0.99 | 81.41 ± 1.10 | 85.88 ± 1.00 |
| Birds          | 88.32 ± 0.75 | 90.52 ± 0.67 | 87.91 ± 0.77 | 90.37 ± 0.65 |
| Textures       | 86.23 ± 0.69 | 87.32 ± 0.63 | 86.51 ± 0.72 | 87.06 ± 0.63 |
| Quickdraw      | 73.38 ± 0.81 | 75.41 ± 0.81 | 72.62 ± 0.88 | 75.30 ± 0.79 |
| Fungi          | 59.57 ± 1.08 | 60.89 ± 1.09 | 60.02 ± 1.14 | 62.16 ± 1.10 |
| VGG_Flower     | 96.88 ± 0.40 | 97.48 ± 0.36 | 96.56 ± 0.41 | 97.24 ± 0.35 |
| Traffic Sign   | 89.93 ± 0.94 | 91.66 ± 0.84 | 89.68 ± 0.94 | 91.20 ± 0.81 |
| MSCOCO         | 64.52 ± 0.98 | 66.54 ± 0.93 | 64.30 ± 0.96 | 65.13 ± 0.99 |
| MNIST          | 96.15 ± 0.50 | 97.24 ± 0.45 | 95.21 ± 0.63 | 96.82 ± 0.49 |
| CIFAR-10       | 90.23 ± 0.66 | 92.23 ± 0.47 | 88.20 ± 0.76 | 89.95 ± 0.66 |
| CIFAR-100      | 82.21 ± 0.79 | 84.48 ± 0.70 | 80.97 ± 0.76 | 82.29 ± 0.76 |
| Average Seen   | 75.7         | <b>77.3</b>  | 75.5         | 75.9         |
| Average Unseen | 82.6         | <b>84.6</b>  | 82.0         | 83.9         |
| Average All    | 82.0         | <b>84.0</b>  | 81.5         | 83.3         |

Table 10. The impact of varying the pre-training and finetuning algorithms in SDL-E setting.

## 12. Additional Results for miniImageNet and CIFAR-FS

Supplementary Table 12 reports the results for evaluating the DIPA framework under the SDL-E setting on CIFAR-FS and mini-ImageNet datasets. Here, we follow PMF [28]

|                | Simple CNAPS | SUR        | URT               | TSA               | DIPA                |
|----------------|--------------|------------|-------------------|-------------------|---------------------|
| SS PT          |              |            |                   |                   | ✓                   |
| Sup. MT        | ✓            | ✓          | ✓                 | ✓                 |                     |
| Backbone       | RN18         | RN18       | RN18              | RN18              | ViT-s               |
| ImageNet       | 47.2 ± 1.0   | 46.7 ± 1.0 | 48.6 ± 1.0        | 48.3 ± 1.0        | <b>60.17 ± 0.80</b> |
| Omniglot       | 95.1 ± 0.3   | 95.8 ± 0.3 | 96.0 ± 0.3        | <b>96.8 ± 0.3</b> | 91.30 ± 0.46        |
| Aircraft       | 74.6 ± 0.6   | 82.1 ± 0.6 | 81.2 ± 0.6        | <b>85.5 ± 0.5</b> | 64.77 ± 0.68        |
| Birds          | 69.6 ± 0.7   | 62.8 ± 0.9 | 71.2 ± 0.7        | 76.6 ± 0.6        | <b>87.55 ± 0.39</b> |
| Textures       | 57.5 ± 0.7   | 60.2 ± 0.7 | 65.2 ± 0.7        | 68.3 ± 0.7        | <b>79.69 ± 0.50</b> |
| Quickdraw      | 70.9 ± 0.6   | 79.0 ± 0.5 | <b>79.2 ± 0.5</b> | 77.9 ± 0.6        | 68.40 ± 0.68        |
| Fungi          | 50.3 ± 1.0   | 66.5 ± 0.8 | 66.9 ± 0.9        | <b>70.4 ± 0.8</b> | 66.57 ± 0.77        |
| VGG_Flower     | 86.5 ± 0.4   | 76.9 ± 0.6 | 82.4 ± 0.5        | 89.5 ± 0.4        | <b>96.96 ± 0.18</b> |
| Traffic Sign   | 55.2 ± 0.8   | 44.9 ± 0.9 | 45.1 ± 0.9        | 72.3 ± 0.6        | <b>83.91 ± 0.45</b> |
| MSCOCO         | 49.2 ± 0.8   | 48.1 ± 0.9 | 52.3 ± 0.9        | 56.0 ± 0.8        | <b>64.64 ± 0.68</b> |
| MNIST          | 88.9 ± 0.4   | 90.1 ± 0.4 | 86.5 ± 0.5        | <b>92.5 ± 0.4</b> | 92.07 ± 0.33        |
| CIFAR-10       | 66.1 ± 0.7   | 50.3 ± 1.0 | 61.4 ± 0.7        | 72.0 ± 0.7        | <b>80.37 ± 0.53</b> |
| CIFAR-100      | 53.8 ± 0.9   | 46.4 ± 0.9 | 52.5 ± 0.9        | 64.1 ± 0.8        | <b>76.79 ± 0.64</b> |
| Average Seen   | 69.0         | 71.2       | 73.8              | 76.7              | <b>76.9 (+0.2)</b>  |
| Average Unseen | 62.6         | 56.0       | 59.6              | 71.4              | <b>74.3 (+2.9)</b>  |
| Average All    | 66.5         | 65.4       | 68.3              | 74.6              | <b>76.4 (+2.2)</b>  |

Table 11. Results of Varying-Way Five-Shot in the MDL setting. Average (Avg.) accuracies are reported. RN: ResNet, ViT-s: ViT-small, SS PT: indicates self-supervised pre-training and Sup. MT: indicates supervised meta-training.

and compare DIPA with relevant existing methods. Our approach can be directly compared with methods that employ SSL for pre-training, both with and without subse-

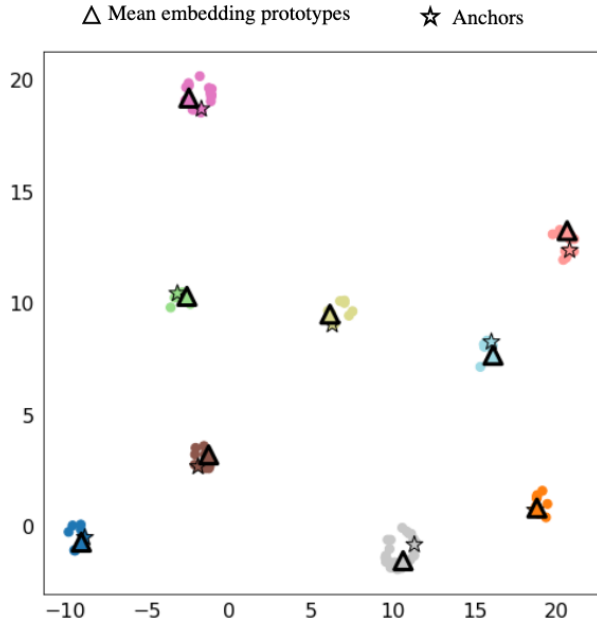

Figure 8. UMAP visualization of clusters formed in the feature space after fine-tuning with mean embedding-based prototypes and anchors  $A_\phi$ .

quent fine-tuning (Supplementary Table 12, row D0-D4). Among those methods, our approach has superior performance across most scenarios. Notably, among the other methods that use various other training strategies, we still obtain somewhat good performance without requiring additional meta-training or training labels.

| ID                          | Method             | Backbone     | Ext. dat. | Ext. lab. | miniImageNet       |                    | CIFAR-FS           |                    |
|-----------------------------|--------------------|--------------|-----------|-----------|--------------------|--------------------|--------------------|--------------------|
|                             |                    |              |           |           | 5/1                | 5/5                | 5/1                | 5/5                |
| <b>Inductive</b>            |                    |              |           |           |                    |                    |                    |                    |
| A0                          | Baseline++ [11]    | CNN-4-64     |           |           | 48.2 ± 0.8         | 66.4 ± 0.6         |                    |                    |
| A1                          | MetaOpt-SVM [36]   | ResNet12     |           |           | 62.6 ± 0.6         | 78.6 ± 0.5         | 72.0 ± 0.7         | 84.2 ± 0.5         |
| A2                          | Meta-Baseline [12] | ResNet12     |           |           | 63.2 ± 0.2         | 79.3 ± 0.2         |                    |                    |
| A3                          | RS-FSL [1]         | ResNet12     |           | ✓         | 65.3 ± 0.8         |                    |                    |                    |
| <b>Transductive</b>         |                    |              |           |           |                    |                    |                    |                    |
| B0                          | Fine-tuning [15]   | WRN-28-10    |           |           | 65.7 ± 0.7         | 78.4 ± 0.5         | 76.6 ± 0.7         | 85.8 ± 0.50        |
| B1                          | SIB [27]           | WRN-28-10    |           |           | 70.0 ± 0.6         | 79.2 ± 0.4         | 80.0 ± 0.6         | 85.3 ± 0.4         |
| B2                          | PT-MAP [29]        | WRN-28-10    |           |           | 82.9 ± 0.3         | 88.8 ± 0.1         | <b>87.7 ± 0.2*</b> | 90.7 ± 0.2         |
| B3                          | CNAPS + FETI [4]   | WRN-28-10    | ✓         | ✓         | 79.9 ± 0.8         | 91.5 ± 0.4         |                    |                    |
| <b>Semi-Supervised</b>      |                    |              |           |           |                    |                    |                    |                    |
| C0                          | LST [39]           | ResNet12     |           | ✓         | 70.1 ± 1.9         | 78.7 ± 0.8         |                    |                    |
| C1                          | PLCM [30]          | ResNet12     |           | ✓         | 72.1 ± 1.1         | 83.7 ± 0.6         | 77.6 ± 1.2         | 86.1 ± 0.7         |
| <b>Self-Supervised</b>      |                    |              |           |           |                    |                    |                    |                    |
| D0                          | ProtoNet [23]      | WRN-28-10    |           |           | 62.9 ± 0.5         | 79.9 ± 0.3         | 73.6 ± 0.3         | 86.1 ± 0.2         |
| D1                          | ProtoNet [10]      | AMDIM ResNet |           | ✓         | 76.8 ± 0.2         | 91.0 ± 0.1         |                    |                    |
| D2                          | EPNet + SSL [50]   | WRN-28-10    |           | ✓         | 79.2 ± 0.9         | 88.1 ± 0.5         |                    |                    |
| D3                          | FewTure [25]       | ViT-small    |           |           | 68.0 ± 0.9         | 84.5 ± 0.5         | <b>76.1 ± 0.9*</b> | 86.1 ± 0.6         |
| D4                          | DIPA               | ViT-small    |           | ✓         | <b>79.6 ± 0.7*</b> | <b>94.3 ± 0.3*</b> | 65.2 ± 0.9         | <b>88.4 ± 0.6*</b> |
| <b>Self-Supervised + MT</b> |                    |              |           |           |                    |                    |                    |                    |
| E0                          | PMF [28]           | ViT-small    |           | ✓         | <b>93.1*</b>       | <b>98.0*</b>       | 81.1               | <b>92.5*</b>       |

Table 12. Comparison with representative state-of-the-art FSL algorithms on miniImageNet & CIFAR-FS for 5-way-1-shot (5/1) and 5-way-5-shot (5/5). Mean accuracy and 95% confidence interval are reported, where available. ✓ indicates the use of Extra data or Extra labels. MT: Meta-train, and \* denotes the highest performance among the most relevant methods that are directly comparable to DIPA while \* denotes the highest performance overall.
